# Supplementary material
Source: PubMed Central journal article supplement (PMC4190678)
Supplement: NIHMS618506-supplement-Supp_TableS1-S6.pdf [file NIHMS618506-supplement-Supp_TableS1-S6.pdf]

## Supplemental tables

**Table S1.** Cost of healthcare personnel, laboratory test fees, HCV medications, adverse events consumables, hospitalizations, and emergency room visits

| Category                                                  | Consumable/Event                                                                         | Cost                                                                        |
|-----------------------------------------------------------|------------------------------------------------------------------------------------------|-----------------------------------------------------------------------------|
| Health-care personnel , imaging, and laboratory test fees | Complete blood count with platelet count and differential (CPT <sup>a</sup> code: 85025) | \$11                                                                        |
|                                                           | HCV RNA quantification (CPT code: 87522)                                                 | \$50                                                                        |
|                                                           | Liver transplant monitor (CPT code:80053)                                                | \$15                                                                        |
|                                                           | Abdominal ultrasound (CPT code: 76700)                                                   | \$109                                                                       |
|                                                           | Abdominal CT with contrast (or MRI depending on renal function) (CPT code: 74160)        | \$360                                                                       |
|                                                           | Hepatologist visit (CPT code: 99204/99205)                                               | Initial: \$191<br>Subsequent: \$113                                         |
|                                                           | Nurse visit (CPT code:99211)                                                             | \$21                                                                        |
| HCV medications                                           | Telaprevir                                                                               | \$4,606 per week                                                            |
|                                                           | Pegylated-interferon                                                                     | \$633 per week                                                              |
|                                                           | Ribavirin                                                                                | \$103 per week                                                              |
| Adverse event management consumables                      | Erythropoietin- $\alpha$                                                                 | \$525 per 40,000 IU <sup>b</sup> dose                                       |
|                                                           | Filgrastim                                                                               | \$132 per 150 mcg dose (Neupogen);<br>\$3,758 per 6mg/0.6mL dose (Neulasta) |
|                                                           | Eltrombopag                                                                              | \$156 per 50 mg dose                                                        |
|                                                           | Blood transfusions                                                                       | \$210 per unit                                                              |

|                  |                                       |         |
|------------------|---------------------------------------|---------|
| Hospitalizations | Anemia (ICD9 <sup>c</sup> : 285.9)    | \$4,590 |
|                  | Cellulitis (ICD9: 682.9)              | \$3,999 |
|                  | Urinary Tract Infection (ICD9: 599.0) | \$5,370 |
|                  | Renal Insufficiency (ICD9:584.9)      | \$7,002 |
|                  | Toxic Diffuse Goiter (ICD9: 242.00)   | \$6,307 |
|                  | Chest Pain (ICD9: 786.50)             | \$4,679 |
| Emergency room   | Anemia (ICD9: 285.9)                  | \$494   |
|                  | Infection (ICD9:592.0)                | \$1,181 |
|                  | Syncope (ICD9: 780.2)                 | \$600   |
|                  | Renal Insufficiency (ICD9: 584.9)     | \$365   |
|                  | Chest Pain (ICD9: 786.50)             | \$690   |
|                  | Weakness (ICD9: 728.87)               | \$553   |
|                  | Fever (ICD9: 276.8)                   | \$508   |
|                  | Abdominal Pain (ICD9: 553.2)          | \$422   |
|                  | Severe Rash (ICD9:782.1)              | \$122   |

<sup>a</sup> CPT: Current procedural terminology

<sup>b</sup> IU: International units

<sup>c</sup> ICD-9: International classification of disease

**Table S2. Comparison of SVR rates in various subgroups**

| Category                           | Sustained virologic response rate (%) | p-value |
|------------------------------------|---------------------------------------|---------|
| Completed treatment                | 72                                    | <0.01   |
| Discontinued due to adverse events | 38                                    |         |
| Completed 48 weeks                 | 75                                    | 0.33    |
| Completed RGT                      | 60                                    |         |
| Black                              | 21                                    | <0.01   |
| White                              | 50                                    |         |
| Males                              | 44                                    | 0.93    |
| Females                            | 45                                    |         |
| Previous treatment response        |                                       | 0.24    |
| Naïve                              | 48                                    |         |
| Relapsers                          | 55                                    |         |
| Non-responders                     | 41                                    |         |
| Intolerance                        | 20                                    |         |
| HIV/HCV co-infected                | 56                                    | 0.31    |
| HCV mono-infection                 | 43                                    |         |
| Fib-4 score $\geq 3.25$            | 36                                    | 0.06    |
| Fib-4 score $< 3.25$               | 49                                    |         |

**Table S3. Cost of medications and blood transfusions for adverse event management**

|                                    | <b>Patients Receiving<br/>n (%)</b> | <b>Median Doses/Units Per Treatment (IQR)</b> | <b>Median Cost Per Treatment (IQR)</b> | <b>Total cost</b> |
|------------------------------------|-------------------------------------|-----------------------------------------------|----------------------------------------|-------------------|
| <b>Epoetin-<math>\alpha</math></b> | 71 (48%)                            | 15 (IQR:6-30)<br>(Range: 1-43)                | \$7,875<br>(\$3,150 – \$13,708)        | \$701,893         |
| <b>G-CSF</b>                       | 14 (8%)                             | 14 (2-29)<br>(Range: 1-46)                    | \$1,851<br>(\$265 – \$3,758)           | \$32,704          |
| <b>Transfusion</b>                 | 13 (9%)                             | 2 (2-4)<br>(Range: 1-20)                      | \$421<br>(\$421 - \$842)               | \$13,066          |

**Table S4. Cost of emergency room visits by cause**

|                     | ICD-9 code | Number of people | Number of emergency room visits | Total cost |
|---------------------|------------|------------------|---------------------------------|------------|
| Anemia              | 285.9      | 4                | 5                               | \$2,472    |
| Infection           | 592.0      | 3                | 4                               | \$1,917    |
| Syncope             | 780.2      | 2                | 3                               | \$1,800    |
| Renal insufficiency | 584.9      | 1                | 2                               | \$730      |
| Chest pain          | 786.5      | 1                | 1                               | \$690      |
| Weakness            | 728.87     | 1                | 1                               | \$553      |
| Fever               | 276.8      | 1                | 1                               | \$508      |
| Abdominal pain      | 553.2      | 1                | 1                               | \$422      |
| Severe rash         | 782.1      | 1                | 1                               | \$122      |
| <b>Total</b>        | -          | 15               | 19                              | \$9,214    |

**Table S5. Cost of hospitalizations by cause**

|                      | ICD-9 code | Number of people | Number of hospitalizations | Total cost |
|----------------------|------------|------------------|----------------------------|------------|
| Anemia               | 285.9      | 12               | 13                         | \$59,670   |
| Infection            | 592.0      | 2                | 2                          | \$14,738   |
| Renal insufficiency  | 584.9      | 2                | 2                          | \$14,004   |
| Toxic diffuse goiter | 242.0      | 1                | 1                          | \$6,307    |
| Chest pain           | 786.5      | 1                | 1                          | \$4,776    |
| Abnormal glucose     | 790.29     | 1                | 1                          | \$3,003    |
| <b>Total</b>         | -          | 19               | 20                         | \$102,403  |

**Table S6. Cost of new direct-acting antivirals and projected cost per SVR**

| <b>DAA regimen</b>                                      | <b>Cost of medications</b> | <b>Observed SVR rate</b> | <b>Cost per SVR</b> |
|---------------------------------------------------------|----------------------------|--------------------------|---------------------|
| <b>Simeprevir-based triple therapy (24 weeks)</b>       | \$84,024                   | 88%                      | \$95,482            |
| <b>Simeprevir-based triple therapy (48 weeks)</b>       | \$101,688                  | 80%                      | \$127,110           |
| <b>Sofosbuvir-based triple therapy (12 weeks)</b>       | \$92,832                   | 90%                      | \$103,147           |
| <b>Sofosbuvir and ribavirin (24 weeks)</b>              | \$170,472                  | 76%                      | \$224,305           |
| <b>Simeprevir, sofosbuvir, and ribavirin (12 weeks)</b> | \$155,270                  | 96%                      | \$161,740           |
